# Supplementary material for: A High Molar Extinction Coefficient Bisterpyridyl Homoleptic Ru(II) Complex with trans-2-Methyl-2-butenoic Acid Functionality: Potential Dye for Dye-Sensitized Solar Cells
Source: Int J Mol Sci. 2012 Mar 14;13(3):3511–26. doi: 10.3390/ijms13033511 (PMC3317725; doi:10.3390/ijms13033511)
Supplement: Supplementary file 1 [file ijms-13-03511-s001.pdf]

# Supplementary Information

Supplementary 1. Structure and FT-IR spectrum of Ligand L1.

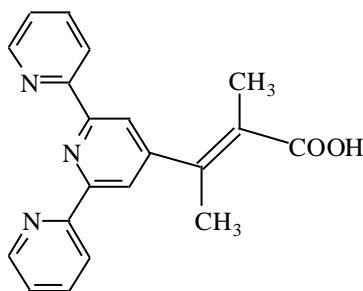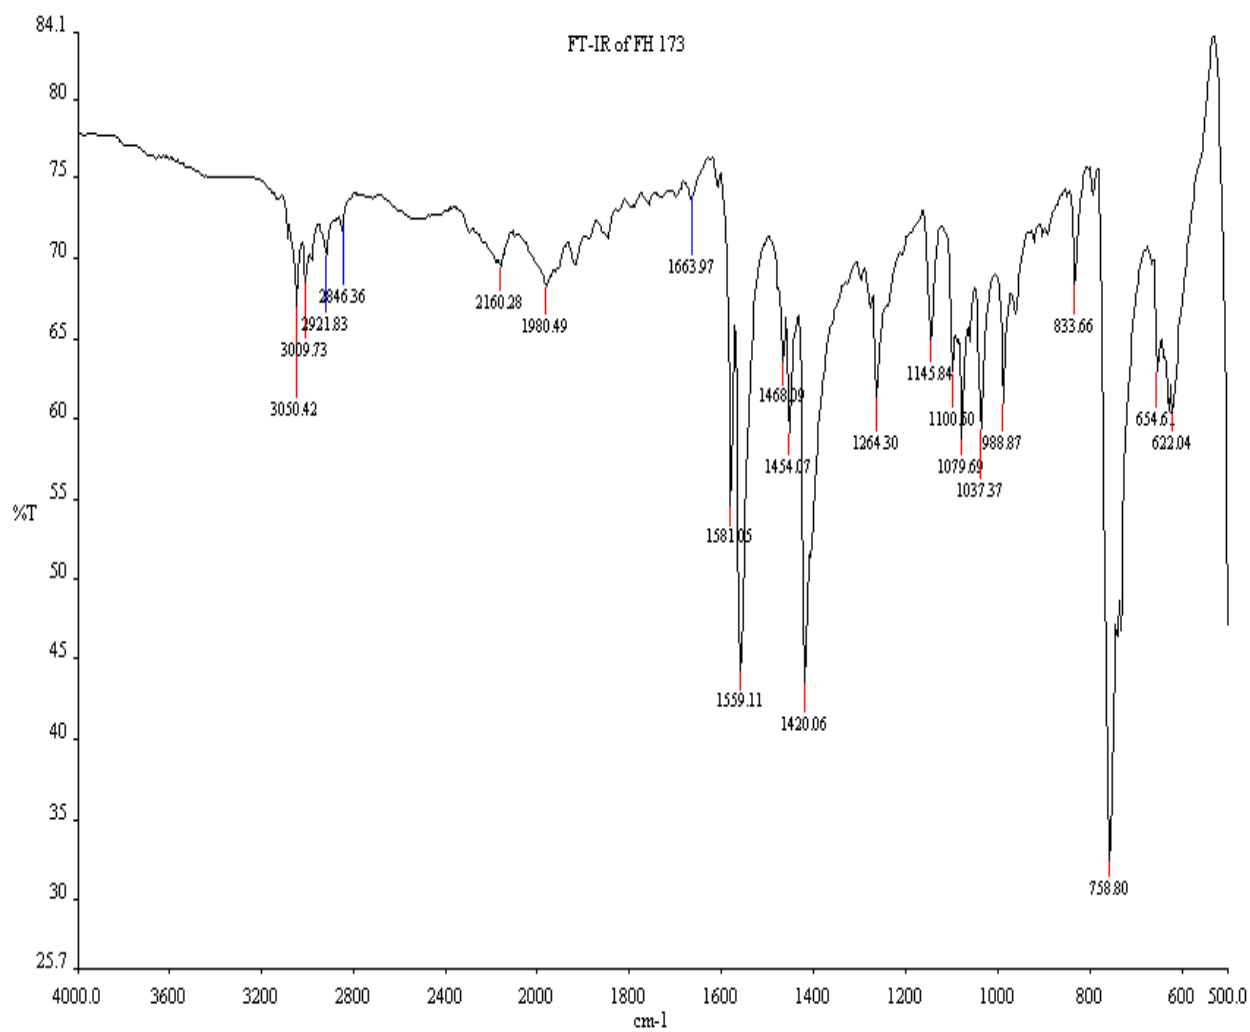

**Supplementary 2.** Structure and FT-IR spectra of unsubstituted terpyridine (red); compared to 4'-bromoterpyridine (black).

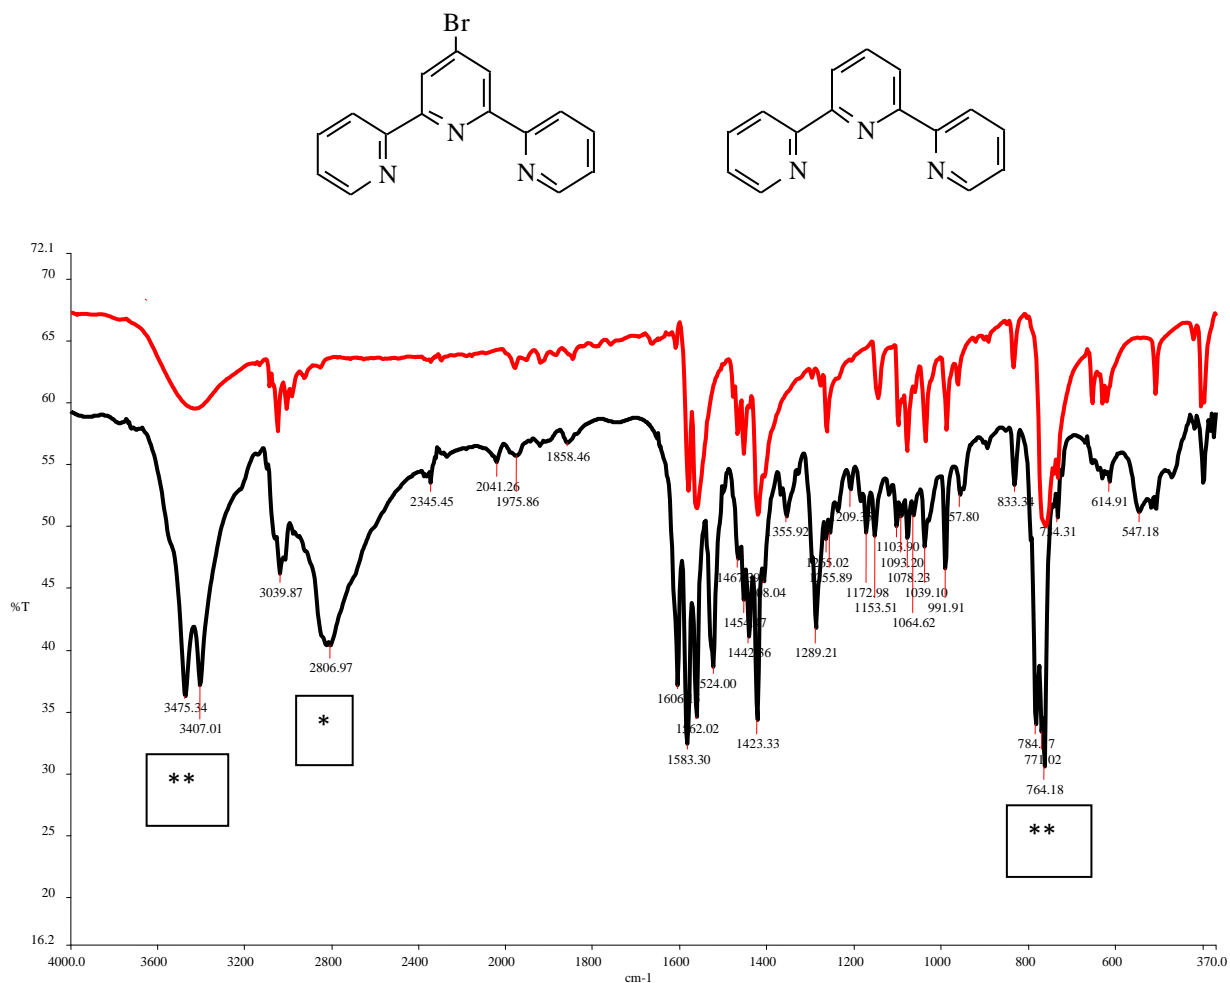

**Supplementary 3.** Aromatic region of  $^1\text{H}$  NMR spectrum of Ligand L1.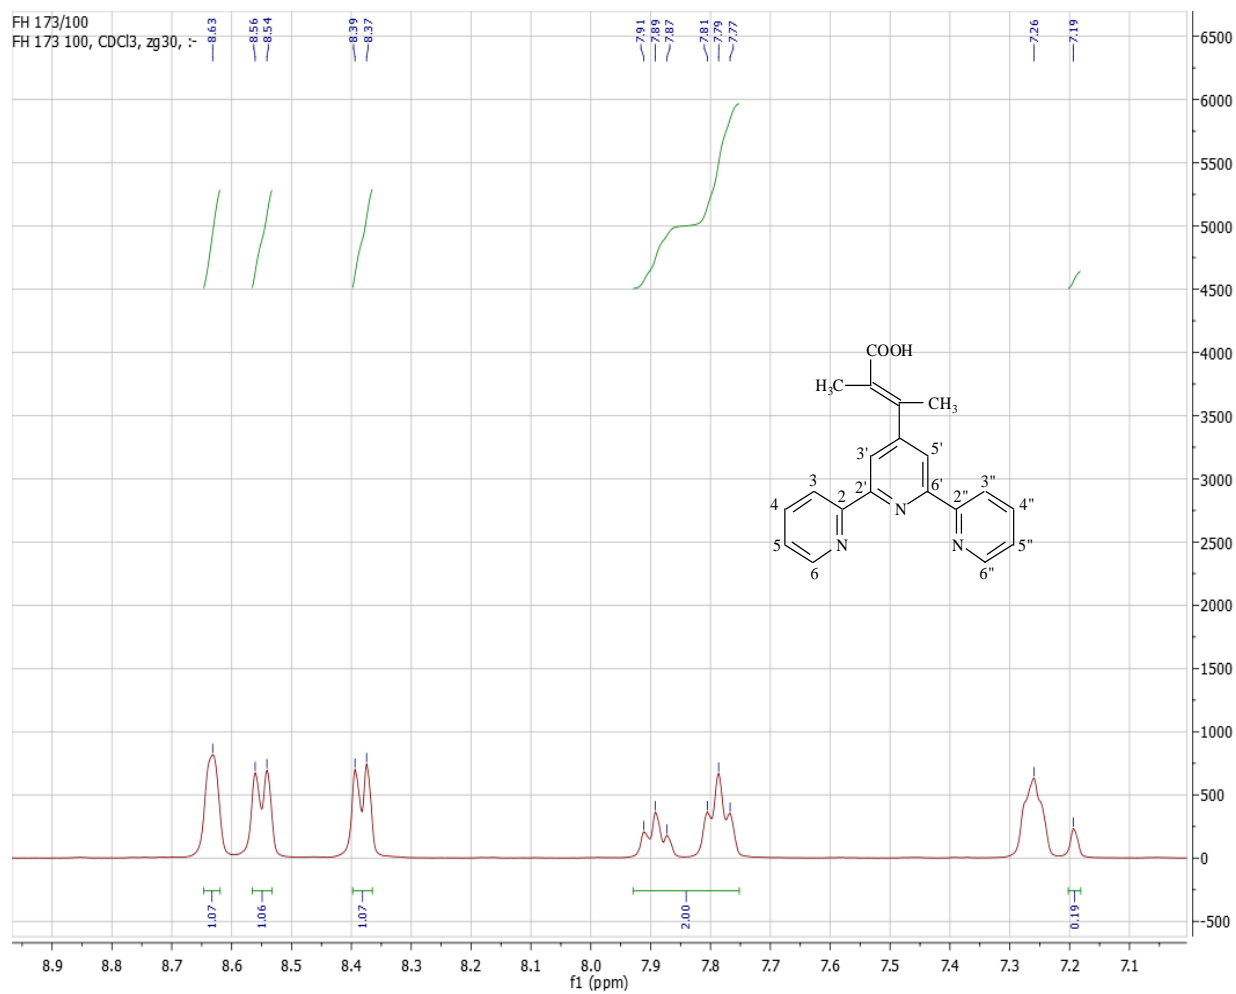

**Supplementary 4.**  $^1\text{H}$  NMR spectrum of Complex  $[\text{Ru}(\text{L1})_2(\text{PF}_6)_2]$ .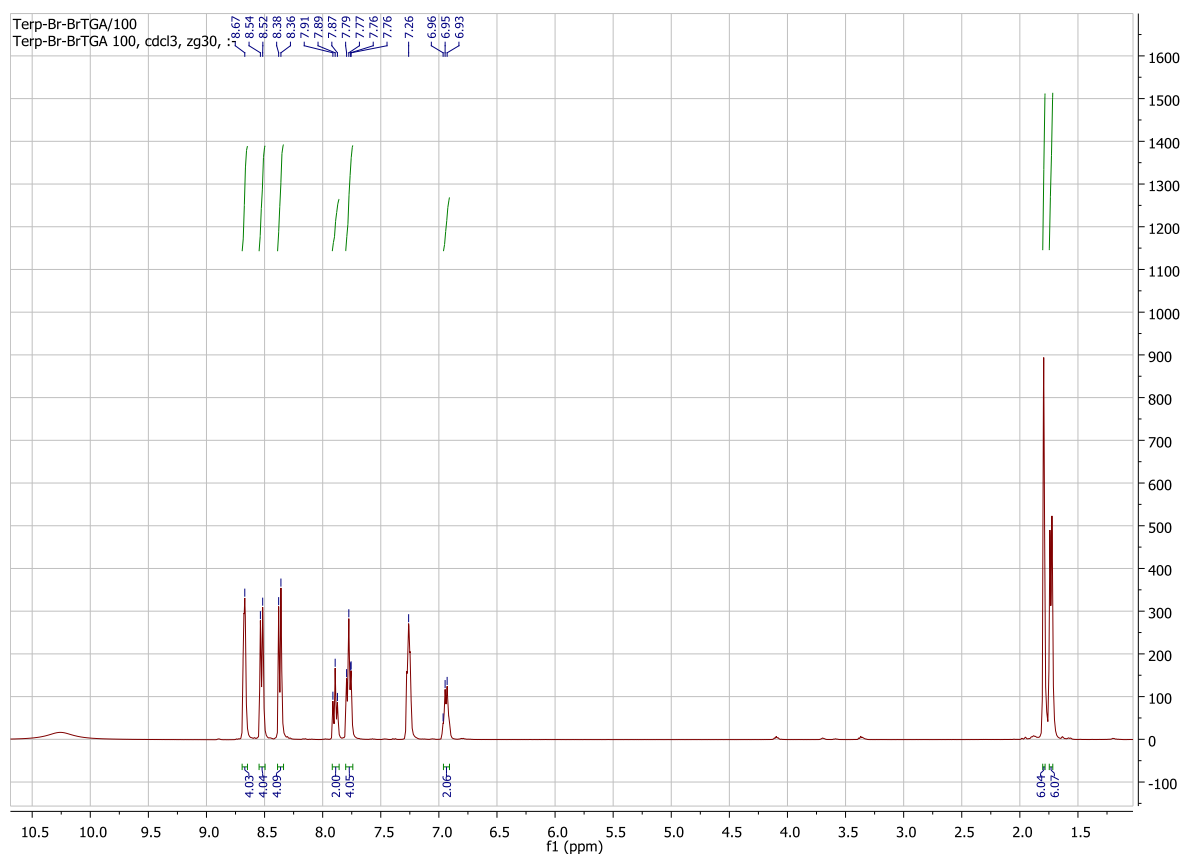

**Supplementary 5.** Aromatic region of  $^1\text{H}$  NMR spectrum of  $[\text{Ru}(\text{L12})(\text{PF}_6)_2]$ .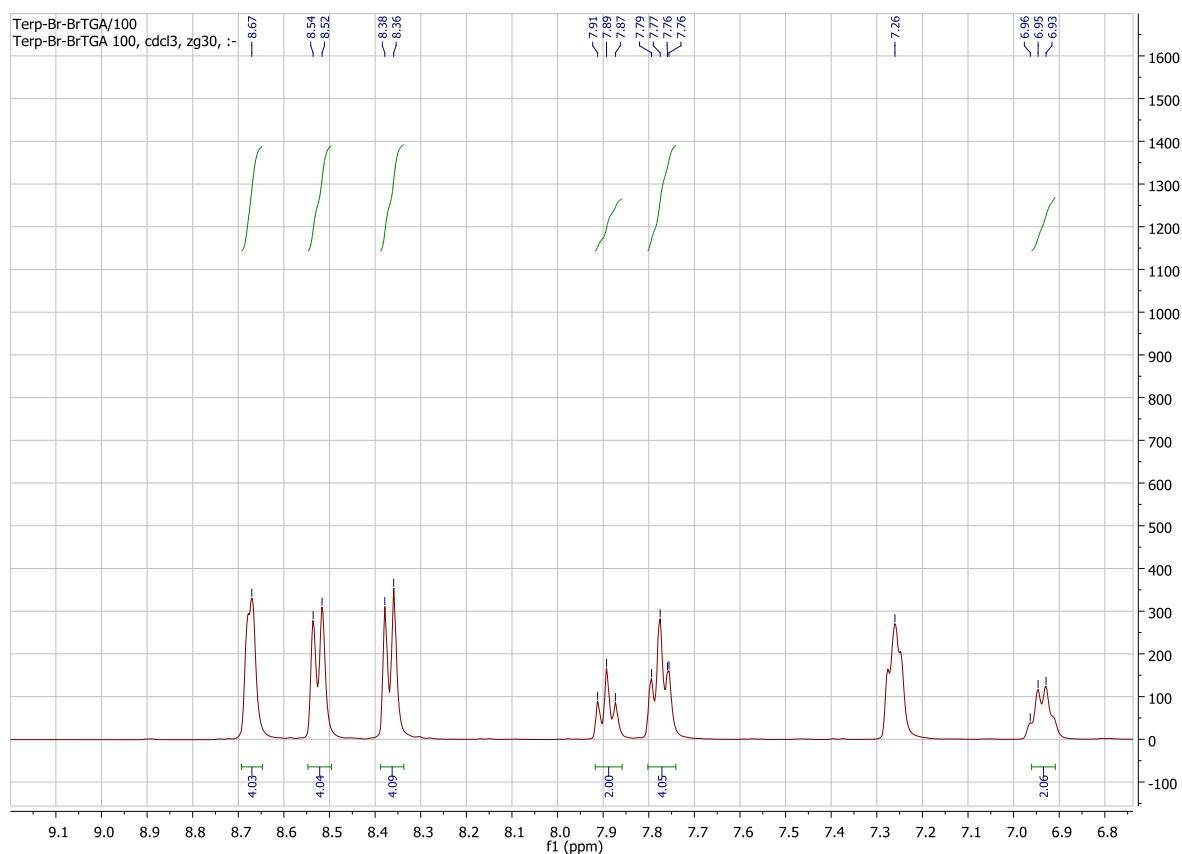

© 2012 by the authors; licensee MDPI, Basel, Switzerland. This article is an open access article distributed under the terms and conditions of the Creative Commons Attribution license (<http://creativecommons.org/licenses/by/3.0/>).
